# Supplementary material for: Therapeutic Potential of Novel Twin Compounds Containing Tetramethylpyrazine and Carnitine Substructures in Experimental Ischemic Stroke
Source: Oxid Med Cell Longev. 2017 Dec 13;2017:7191856. doi: 10.1155/2017/7191856 (PMC5745738; doi:10.1155/2017/7191856)
Supplement: Supplementary materials — Figure S1: The regional cerebral blood flow (rCBF) in the middle cerebral artery region was monitored by laser doppler flowmetry. Figure S2: The effects of Compound LR134 on stroke outcomes under sham-operated and cerebral ischemia reperfusion (I/R) states. Figure S3: Cell viability was evaluated by CCK-8 (WST-8) assay in PC12 cells under OGD condition with different concentrations (A) or time treatments (B) of compound LR134. [file 7191856.f1.zip]

Archive with 5 entries (5 files):
- 7191856.f3.eps
- 7191856.f4.eps
- 7191856.f5.eps
- 7191856.f1.docx
- 7191856.f2.pdf
